# Supplementary material
Source: PubMed Central journal article supplement (PMC3113246)
Supplement: mmc1.pdf [file mmc1.pdf]

The American Journal of Human Genetics, Volume 88

## Supplemental Data

### X-Linked Congenital Hypertrichosis Syndrome

### Is Associated with Interchromosomal Insertions

### Mediated by a Human-Specific Palindrome near *SOX3*

Hongwen Zhu, Dandan Shang, Miao Sun, Sunju Choi, Qing Liu, Jiajie Hao, Luis E Figuera, Feng Zhang, Kwong Wai Choy, Yang Ao, Yang Liu, Xiao-Lin Zhang, Fengzhen Yue, Ming-Rong Wang, Li Jin, Pragna I. Patel, Tao Jing, and Xue Zhang

**Table S1. PCR Primers Used in the Study**

## For microsatellite markers

| Marker  | Forward Primer (5'-3') | Reverse Primer (5'-3')  |
|---------|------------------------|-------------------------|
| ZLS1    | GGGCAACAGAGAGTGAGAC    | GGCCCACCCTAATCCAATAT    |
| ZLS2    | TTAGCCAGACCTCACAATTG   | GCAGTATTGGTAGGATATCT    |
| ZLS3    | GCCCAAAGCTAGTCAACAG    | AGGCTGCAATGAGCTGTAA     |
| ZLS4    | TCTTCAACCAGAGTACCCATTG | GTTCTCTTTACAGACAGTTCATC |
| ZLS5    | GCAGAAATTACCTATATCTTC  | GAATGGATGGAGAGATGTAT    |
| ZLS6    | GGAAGGAGGAAGGAAGGAAAC  | GCACTCTTGGGCACTTATC     |
| ZLS7    | AGCAGTTTCGTGGTTTGTTC   | AAGCCTGGGTAGTCGTAGTT    |
| DXS1211 | GGCAGAACTTGATAGGTAGAT  | TCTTTTCTAGACCCTTCTGGC   |
| ZLS8    | TGTCCTGTCATGTTGGTAAAT  | CATGCTCATGATTTAACACTG   |
| DXS1227 | AGAGGTCCGAGTCTTCCAC    | ATAAGGGTTTACTCCCCCAA    |
| ZLS9    | GAGGAACAGTATCTTCTTGGTC | TGAGATTGTGTCCAGGTCTT    |
| ZLS10   | TGAAATCTGTTAGCCTTCTTG  | GCATATTTGCATAATGAGGAT   |
| ZLS11   | CTACATATCTACACCATCCTC  | ATGAGGCATCAGTGGAGGTC    |
| DXS8106 | AGTTCACATCCGTATCTAC    | AGCTGTAGAGTTGAGGAATG    |

## For qPCR assays

| Target | Forward Primer (5'-3')     | Reverse Primer (5'-3')   |
|--------|----------------------------|--------------------------|
| 5q35.3 | TCCTCTCAACAATTAGATGCCTGTAG | ACCAAGTTTCACACCAGTTTCCAT |
| 4q31.2 | CCAGCCTTGTCATCATCAGATTC    | AGTTGGCCGATTCCTCAGAAG    |

## For long-range PCR to amplify insertion junctions

| Target | Forward Primer (5'-3')       | Reverse Primer (5'-3')       |
|--------|------------------------------|------------------------------|
| D-JBc  | GGTAGCATCTCTCAAATCAACCAGGTAT | AATGCTTTGTAGTGGCTTTGTTTCC    |
| P-JBc  | GTTAGCATCTTCAAATCCTGGAAC     | CTCAAGGCCTCCATCCTCAATATC     |
| D-JBm  | AATGCTTTGTAGTGGCTTTGTTTCC    | GAATCGTAAGTTCTGGTGGCATTGTGGG |
| P-JBm  | GTTAGCATCTTCAAATCCTGGAAC     | AAGCTCTGCGCAGCTTGCCAGCAC     |

D-JBc, distal JBPcn; P-JBc, proximal JBPcn; D-JBm, distal JBPmx; P-JBm, proximal JBPmx.

## For long-range PCR to screen palindrome-mediated insertions in male controls

| Target     | Forward Primer (5'-3')    | Reverse Primer (5'-3')    |
|------------|---------------------------|---------------------------|
| Palindrome | TGGCATTACAAGAGTTAGCTTCTGA | AATGCTTTGTAGTGGCTTTGTTTCC |

## For RT-PCR analysis

| Target | Forward Primer (5'-3')     | Reverse Primer (5'-3')   |
|--------|----------------------------|--------------------------|
| SOX3   | GTTGGGACGCCTTGTTTACG       | TAGCGGAAGAAATATCAAACAG   |
| GAPDH  | TGAAGGTCGGAGTCAACGGATTTGGT | CATGTGGGCCATGAGGTCCACCAC |

**Table S2. Two-Point LOD Scores for Markers on Chromosome Xq26.3-q27.2**

| Marker  | Repeat | $\theta=$ |       |       |       |       |
|---------|--------|-----------|-------|-------|-------|-------|
|         |        | 0.0       | 0.1   | 0.2   | 0.3   | 0.4   |
| ZLS1    | AGAA   | $-\infty$ | 0.53  | 0.53  | 0.37  | 0.16  |
| ZLS2    | AGAT   | $-\infty$ | 2.32  | 1.95  | 1.38  | 0.67  |
| ZLS3    | TATT   | $-\infty$ | 1.05  | 1.01  | 0.78  | 0.45  |
| ZLS4    | CA     | 2.37      | 2.33  | 2.19  | 2.01  | 1.61  |
| ZLS5    | TCTA   | 3.61      | 3.02  | 2.35  | 1.60  | 0.76  |
| ZLS6    | AAGG   | 3.91      | 3.27  | 2.56  | 1.75  | 0.84  |
| ZLS7    | ATCT   | 3.91      | 3.27  | 2.56  | 1.75  | 0.84  |
| DXS1211 | AC     | 3.91      | 3.27  | 2.56  | 1.75  | 0.84  |
| ZLS8    | ATCT   | 3.91      | 3.27  | 2.56  | 1.75  | 0.84  |
| DXS1227 | CA     | 2.37      | 2.01  | 1.61  | 1.15  | 0.62  |
| ZLS9    | GT     | 2.37      | 2.01  | 1.61  | 1.15  | 0.62  |
| ZLS10   | CA     | $-\infty$ | 2.32  | 1.96  | 1.39  | 0.71  |
| ZLS11   | CA     | $-\infty$ | 1.06  | 1.05  | 0.72  | 0.25  |
| DXS8106 | CA     | $-\infty$ | -1.72 | -1.02 | -0.72 | -0.41 |

**Table S3. Palindrome-Mediated Deletions in Normal Control Individuals**

| Ethnic Group | Case   | Size (bp) & Position (GRCh37/hg19)    | Insert (bp) | Reference            |
|--------------|--------|---------------------------------------|-------------|----------------------|
| Chinese      | 114    | 6,374 (chrX: 139,496,584-139,502,957) |             | This study           |
| Chinese      | 4      | 7,918 (chrX: 139,495,035-139,502,951) | 102         | This study           |
| Mexican      | 195CA  | 1,565 (chrX: 139,501,394-139,502,958) | 60          | This study           |
| Mexican      | 179CA  | 173 (chrX: 139,502,954-139,503,126)   | 2           | This study           |
| Indian       | GIP024 | 7991 (chrX: 139,494,993-139,502,983)  |             | This study           |
| Indian       | GIP124 | 7991 (chrX: 139,494,993-139,502,983)  |             | This study           |
| Indian       | GIP163 | 7991 (chrX: 139,494,993-139,502,983)  |             | This study           |
| Indian       | GIP044 | 9104 (chrX: 139,493,885-139,502,988)  | 19          | This study           |
| Indian       | PAT473 | 7963 (chrX: 139,494,995-139,502,957)  |             | This study           |
| Yoruban      |        | 209 (chrX: 139,502,954-139,503,162)   |             | Bentley, et al. 2008 |

**Insert refers to concomitant insertion. Breakpoints within the palindrome are in red.**

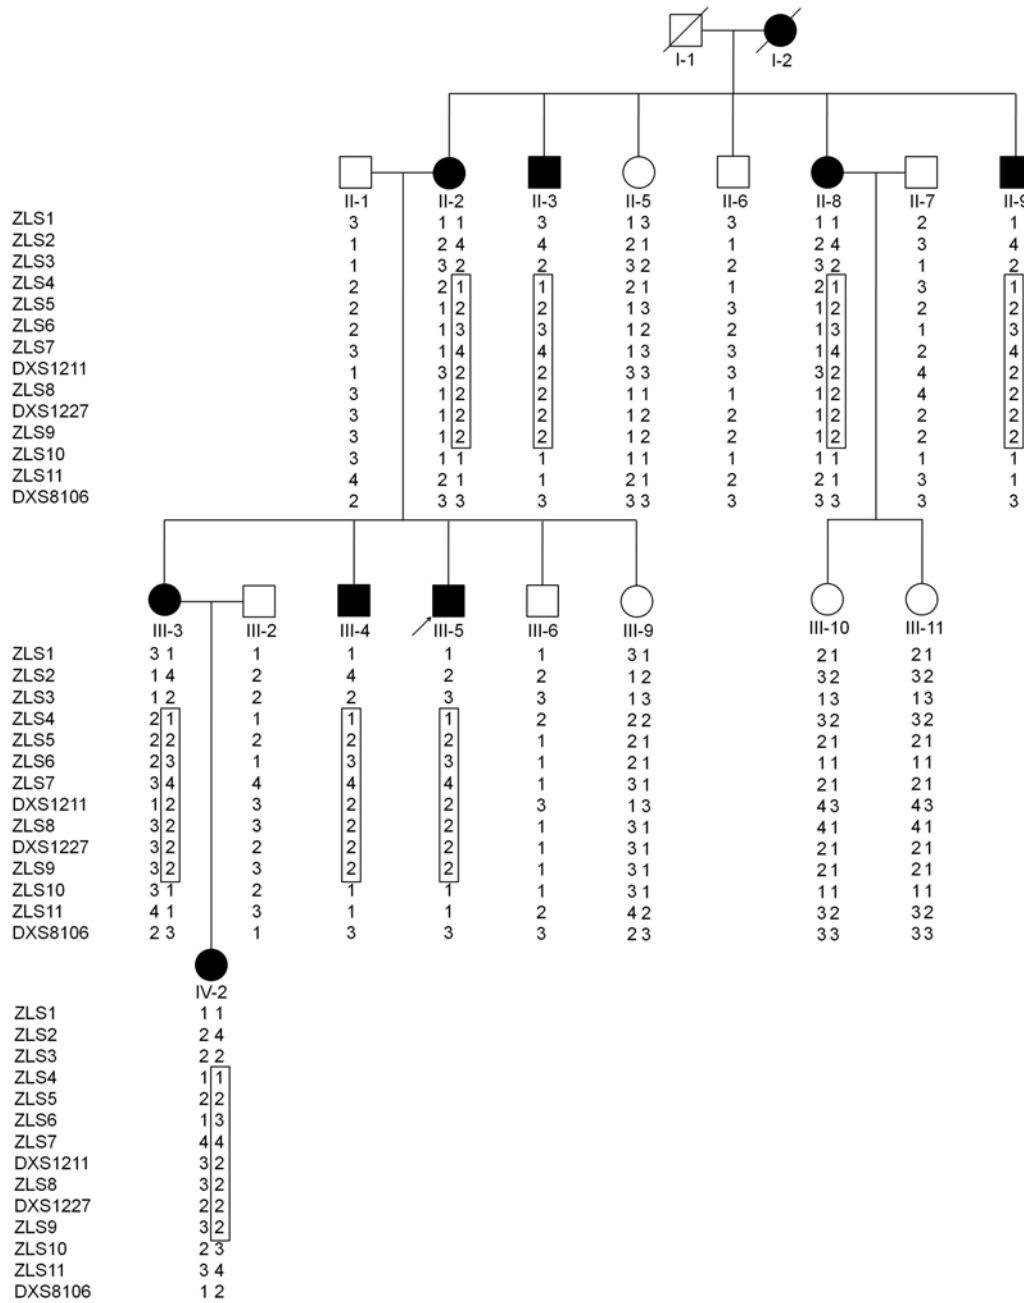

**Figure S1. Haplotype Analysis of the Chinese Family with a Distinct X-Linked Hypertrichosis Syndrome**

The linked haplotype is boxed.

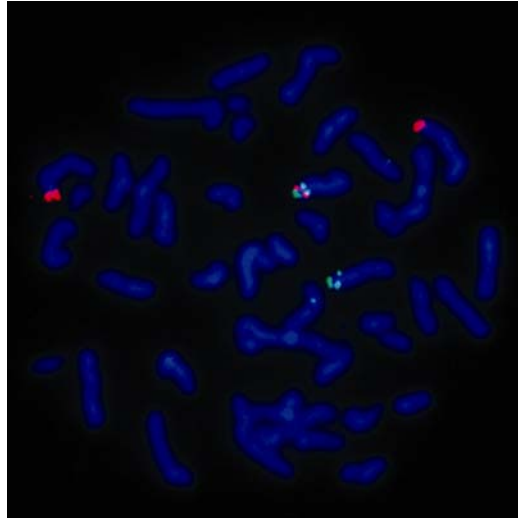

**Figure S2. Original Metaphase FISH from which Figure 2D was Prepared**

```

chr5      177957135+  GGTCCACACATCTTTTGAGATTCTTCCCATCAAAGGCAGAGTGTGGCCAGGTGTGGTGGCTCAA 177957200
Reads with Difference:
*
GB50E9E01AYYGV      150-  GGTCCACACATCTTTTGAGATTCTTCCCATCA 119
GB50E9E02GCDUB      304+  GGTCCACACATCTTTTGAGATTCTTCCCATCA 335
GB50E9E02JL9V0      202-  GGTCCACACATCTTTTGAGATTCTTCCCATCA 171
GB50E9E01BMFP4      255-  GGTCCACACATCTTTTGAGATTCTTCCCATCA 224
GB50E9E02HCIWV      387-  GGTCCACACATCTTTTGAGATTCTTCCCATCA 356
GB50E9E01AWY1N      306-  GGTCCACACATCTTTTGAGATTCTTCCCATCA 275
GB50E9E01CMLRN      117+  GGTCCACACATCTTTTGAGATTCTTCCCATCA 149
GB50E9E02IU8XF      110+  GGTCCACACATCTTTTGAGATTCTTCCCATCA 141
GB50E9E02IMG9B      291-  GGTCCACACATCTTTTGAGATTCTTCCCATCA 260
GB50E9E02JHJMP      382-  GGTCCACACATCTTTTGAGATTCTTCCCATCA 351
GB50E9E01B00PS      331-  GGTCCACACATCTTTTGAGATTCTTCCCATCA 300
*
chrX      139502921+  TTCAGTGCCTTTTAAAAAGCAATATAAGCTATATCTAGCTTATATATTGCTTTTTAAAAAGCCTG 139502986
Reads with Difference:
*
GB50E9E01AYYGV      118-  ATATCTAGCTTATATATTGCTTTTTAAAAAGCCTG 84
GB50E9E02GCDUB      336+  ATATCTAGCTTATATATTGCTTTTTAAAAAGCCTG 370
GB50E9E02JL9V0      170-  ATATCTAGCTTATATATTGCTTTTTAAAAAGCCTG 136
GB50E9E01BMFP4      223-  ATATCTAGCTTATATATTGCTTTTTAAAAAGCCTG 189
GB50E9E02HCIWV      355-  ATATCTAGCTTATATATTGCTTTTTAAAAAGCCTG 321
GB50E9E01AWY1N      274-  ATATCTAGCTTATATATTGCTTTTTAAAAAGCCTG 240
GB50E9E01CMLRN      150+  ATATCTAGCTTATATATTGCTTTTTAAAAAGCCTG 184
GB50E9E02IU8XF      142+  ATATCTAGCTTATATATTGCTTTTTAAAAAGCCTG 176
GB50E9E02IMG9B      259-  ATATCTAGCTTATATATTGCTTTTTAAAAAGCCTG 225
GB50E9E02JHJMP      350-  ATATCTAGCTTATATATTGCTTTTTAAAAAGCCTG 316
GB50E9E01B00PS      299-  ATATCTAGCTTATATATTGCTTTTTAAAAAGCCTG 265
*

```

**Figure S3. Alignment of 11 MPS Reads to the Human Genome Reference Revealing a Junction between the 5q35.3 and Xq27.1 Sequences**

All genomic positions correspond to February 2009 human reference sequence (GRCh37).

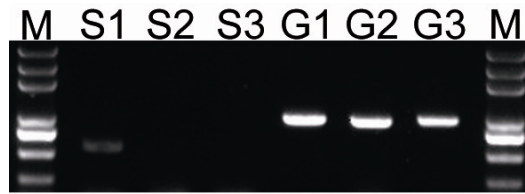

**Figure S4. Expression of mRNA for *SOX3* and *GAPDH* in Human Hair Follicles**

M: DL2,000 DNA marker (TaKaRa); S1-S3: RT-PCR of *SOX3*; G1-G3: RT-PCR of *GAPDH*; S1 and G1: PCR using fetal brain cDNA control (Clontech); S2 and G2: RT-PCR in scalp hair follicles from an individual with a normal hair growth; S3 and G3: RT-PCR in hair follicles from the proband of the Chinese family.
